# Supplementary material for: Functional Bionanocomposite Fibers of Chitosan Filled with Cellulose Nanofibers Obtained by Gel Spinning
Source: MDPI journal article supplement (doi:10.3390/polym13101563), 2021-05-13
Supplement: s1 [file s1]

# Functional Bionanocomposite Fibers of Chitosan Filled with Cellulose Nanofibers Obtained by Gel Spinning

Sofia Marquez-Bravo <sup>1,2,3</sup>, Ingo Doench <sup>1,2,3</sup>, Pamela Molina <sup>1,2,3</sup>, Flor Estefany Bentley <sup>1,2,3</sup>, Arnaud Kamdem Tamo <sup>1,2,3</sup>, Renaud Passieux <sup>4</sup>, Francisco Lossada <sup>5</sup>, Laurent David <sup>4</sup> and Anayancy Osorio-Madrado <sup>1,2,3,\*</sup>

<sup>1</sup> Institute of Microsystems Engineering IMTEK, University of Freiburg, 79110 Freiburg, Germany; sofia.marquez@imtek.uni-freiburg.de (S.M.-B.); ingo.doench@imtek.uni-freiburg.de (I.D.); molina@tf.uni-freiburg.de (P.M.); estefany.bentley@imtek.uni-freiburg.de (F.E.B.); arnaud.kamdem@imtek.uni-freiburg.de (A.K.T.)

<sup>2</sup> Freiburg Materials Research Center FMC, University of Freiburg, 79104 Freiburg, Germany

<sup>3</sup> Freiburg Center for Interactive Materials and Bioinspired Technologies FIT, University of Freiburg, 79110 Freiburg, Germany

<sup>4</sup> Laboratoire Ingénierie des Matériaux Polymères IMP, CNRS UMR 5223, University Claude Bernard Lyon 1, University of Lyon, 69622 Villeurbanne Cedex, France; renaud.passieux@etu.univ-lyon1.fr (R.P.); laurent.david@univ-lyon1.fr (L.D.)

<sup>5</sup> Department of Chemistry, University of Mainz, 55128 Mainz, Germany; francisco.lossada@uni-mainz.de

\* Correspondence: anayancy.osorio@imtek.uni-freiburg.de; Tel.: +49-761-203-67363

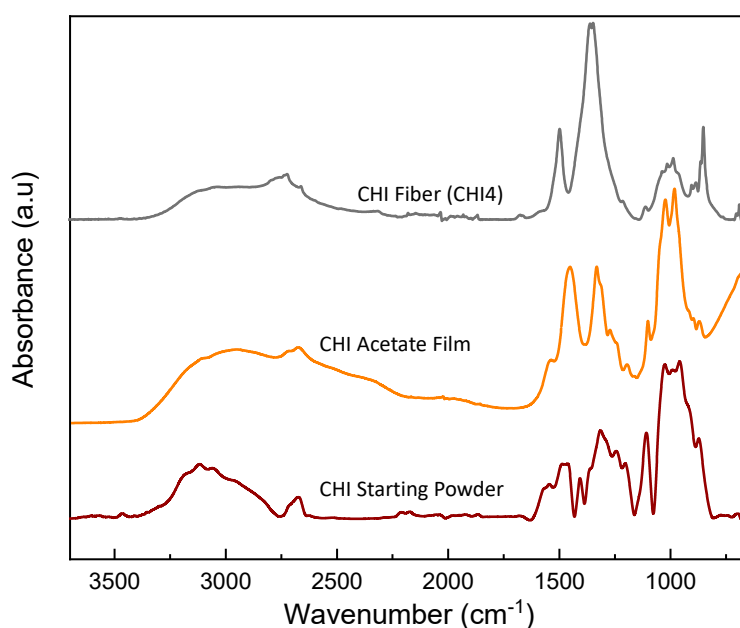

**Figure S1.** FTIR spectra of starting chitosan powder, and after its processing into chitosan fiber (formulation CHI4% in the manuscript) and into chitosan acetate film materials.
